# Supplementary material for: Rubrene single crystal solar cells and the effect of crystallinity on interfacial recombination
Source: Royal Society of Chemistry journal article supplement (doi:10.1039/d2cp00985d), 2022-01-01
Supplement: d2cp00985d1.pdf [file d2cp00985d1.pdf]

## Supporting information

### Rubrene Single Crystal Solar Cells and the Effect of Crystallinity on Interfacial Recombination

Duygu Akin Kara<sup>\*ab†</sup>, Edmund K. Burnett<sup>a</sup>, Koray Kara<sup>ac</sup>, Ozlem Usluer<sup>a</sup>, Benjamin P. Cherniawski<sup>a</sup>, Edward J. Barron III<sup>a</sup>, Burak Gultekin<sup>b</sup>, Mahmut Kus<sup>d</sup>, and Alejandro L. Briseno<sup>\*ae</sup>

<sup>†</sup>Department of Polymer Science and Engineering, University of Massachusetts Amherst, Amherst, MA, 01003, USA

**KEYWORDS.** *Rubrene, Single crystal, solar cell, interface recombination.*

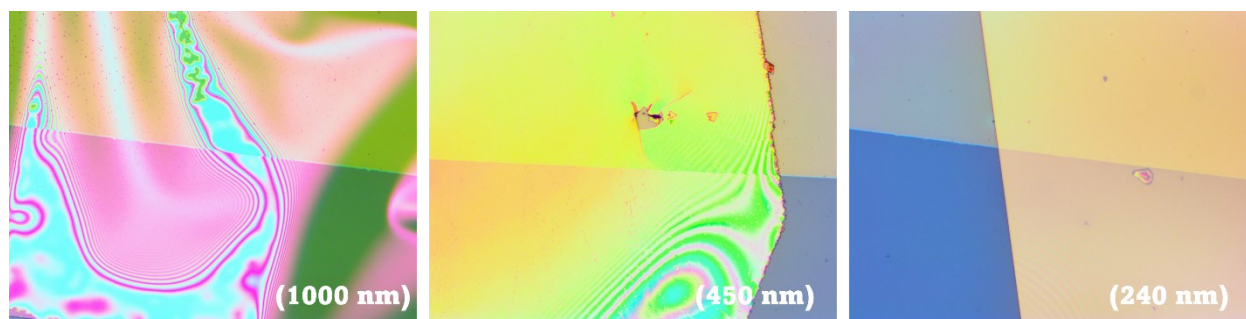

**Figure S1.** Optical Microscope images of Rubrene single crystals with varied thickness.

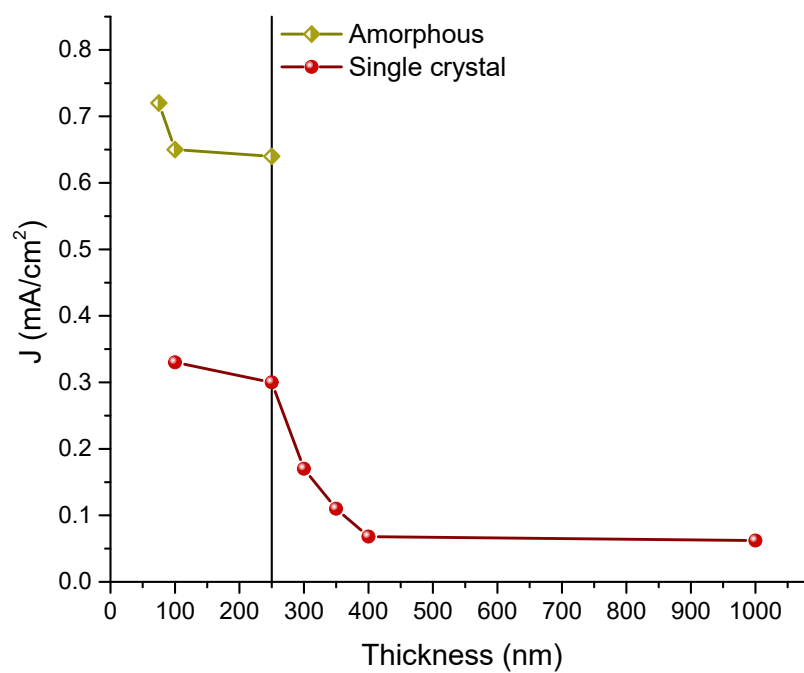

**Figure S2. Optimum thickness comparison for single crystal and thin film layer of rubrene for inverted bilayer organic solar cells.**

**Table S1. Extracted solar cell parameters from illuminated J-V characteristics of rubrene single crystal solar cells.**

| Sample  | J <sub>sc</sub> (mA/cm <sup>2</sup> ) | V <sub>oc</sub> (mV) | FF   | PCE (%) |
|---------|---------------------------------------|----------------------|------|---------|
| 250 nm  | 0.3                                   | 600                  | 0.57 | 0.1     |
| 300 nm  | 0.17                                  | 590                  | 0.48 | 0.05    |
| 350 nm  | 0.11                                  | 570                  | 0.44 | 0.03    |
| 400 nm  | 0.068                                 | 580                  | 0.51 | 0.02    |
| 1000 nm | 0.062                                 | 500                  | 0.39 | 0.01    |

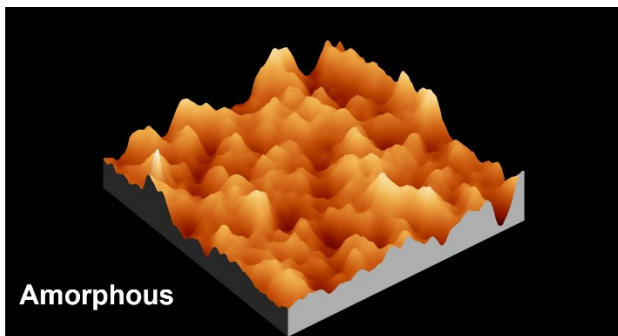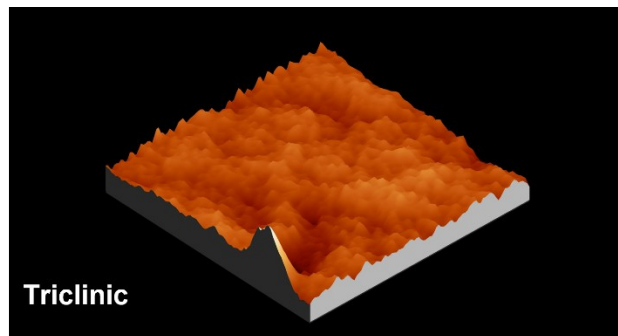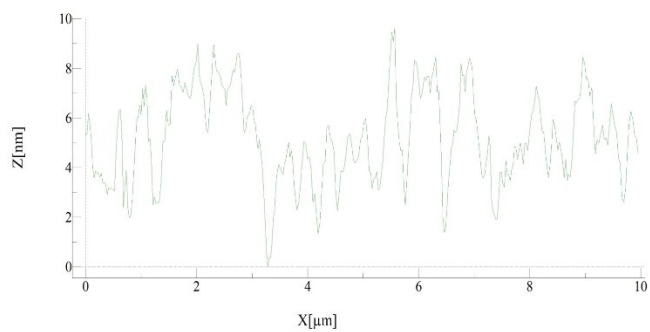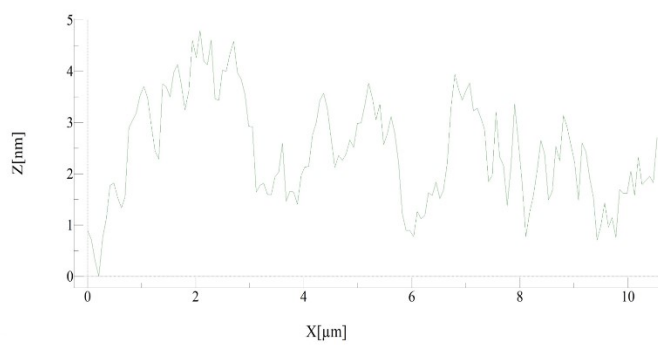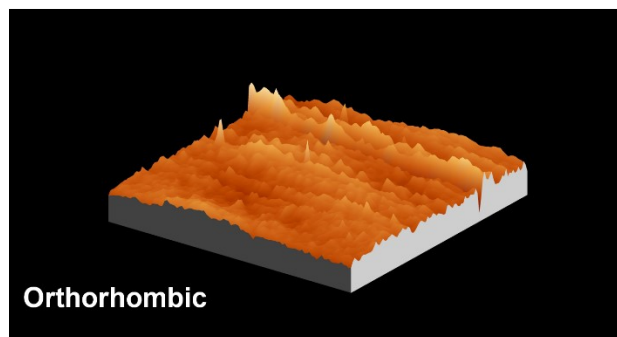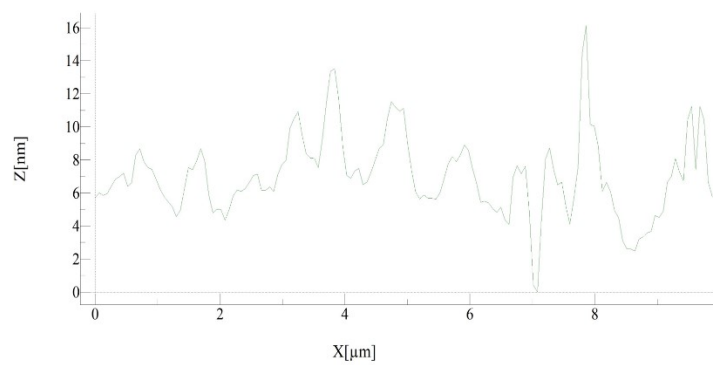

**Figure S3. 3D AFM images and surface profile of rubrene amorphous, triclinic and orthorhombic films.**

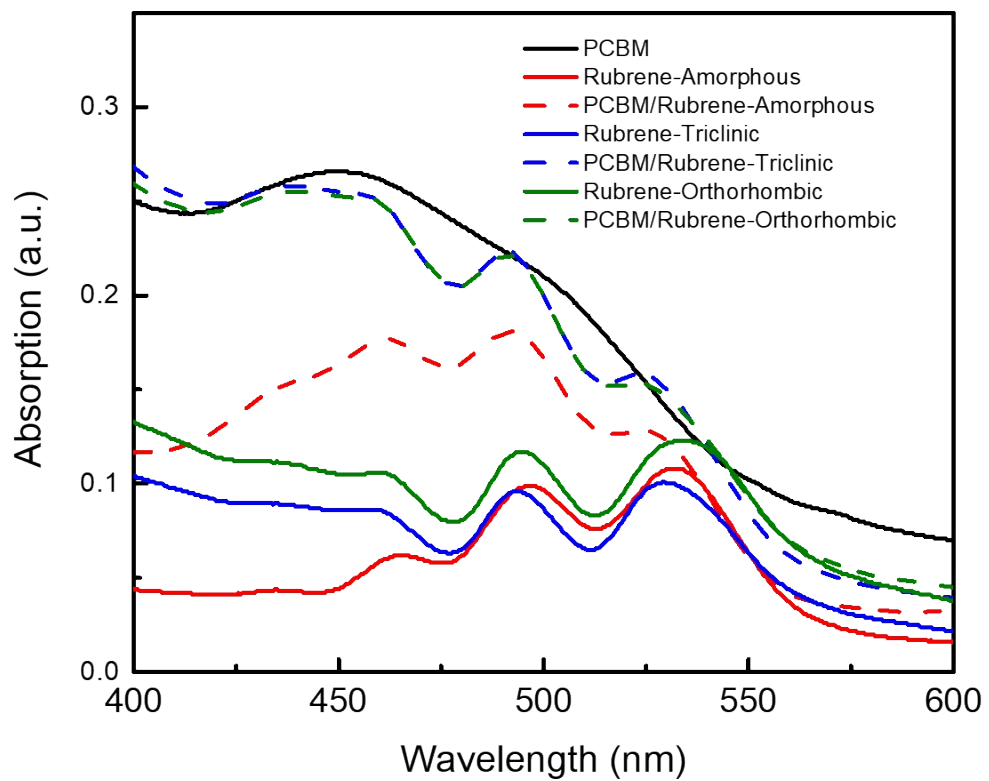

Figure S4. The absorption in PCBM, PCBM/rubrene-amorphous, PCBM/rubrene-triclinic, PCBM/rubrene-orthorhombic films as a function of wavelength.

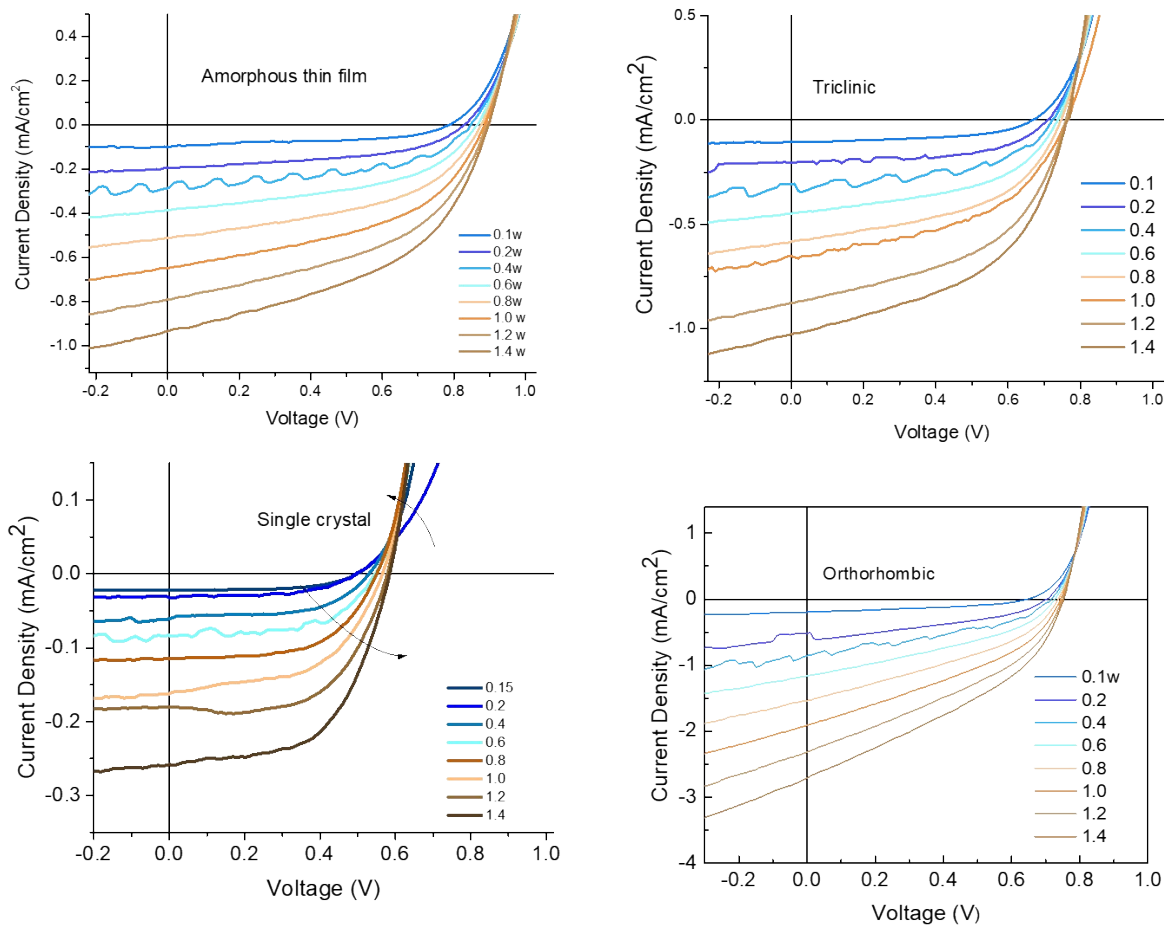

**Figure S5. J-V curve were taken under different light intensity.**
